# Supplementary material for: Isolation and purification ofent-pimara-8(14),15-diene from engineeredAspergillus nidulansby accelerated solvent extraction combined with HPLC
Source: Royal Society of Chemistry journal article supplement (doi:10.1039/c3ay41640b), 2013-12-11
Supplement: c3ay41640b.pdf [file c3ay41640b.pdf]

## Supporting information

### **Isolation and Purification of *ent*-Pimara-8(14),15-diene from engineered *Aspergillus nidulans* by Accelerated Solvent Extraction Combined with HPLC**

K. Bromann\*<sup>a</sup>, K. Viljanen<sup>a</sup>, V. M. Moreira<sup>b</sup>, J. Yli-Kauhaluoma<sup>b</sup>, L. Ruohonen<sup>a</sup> and T. Nakari-Setälä<sup>a</sup>

\*Correspondence: Kirsi Bromann, VTT Technical Research Centre of Finland, Tietotie 2, FI-02044 VTT, Finland. E-mail: kirsi.bromann@vtt.fi, Phone +358 40 067 5071, Fax +358 20 722 7071.

<sup>a</sup> VTT Technical Research Centre of Finland, Tietotie 2, FI-02044 VTT, Finland.

<sup>b</sup> Division of Pharmaceutical Chemistry, Faculty of Pharmacy, University of Helsinki, Viikinkaari 5E, FI-00014 University of Helsinki, Finland.

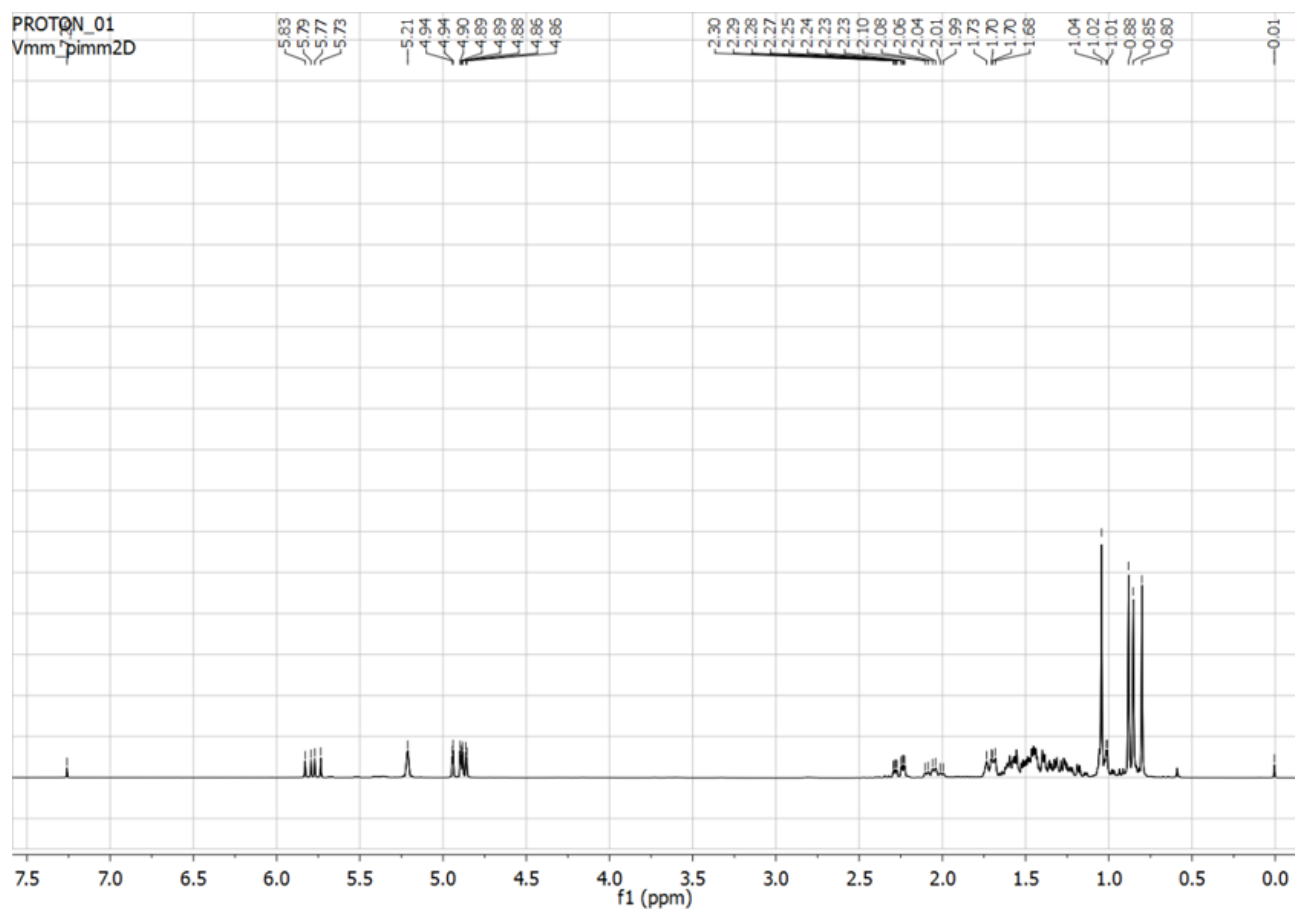

**Fig. 1S**  $^1\text{H-NMR}$  spectrum of *ent*-pimara-8(14),15-diene recorded in  $\text{CDCl}_3$

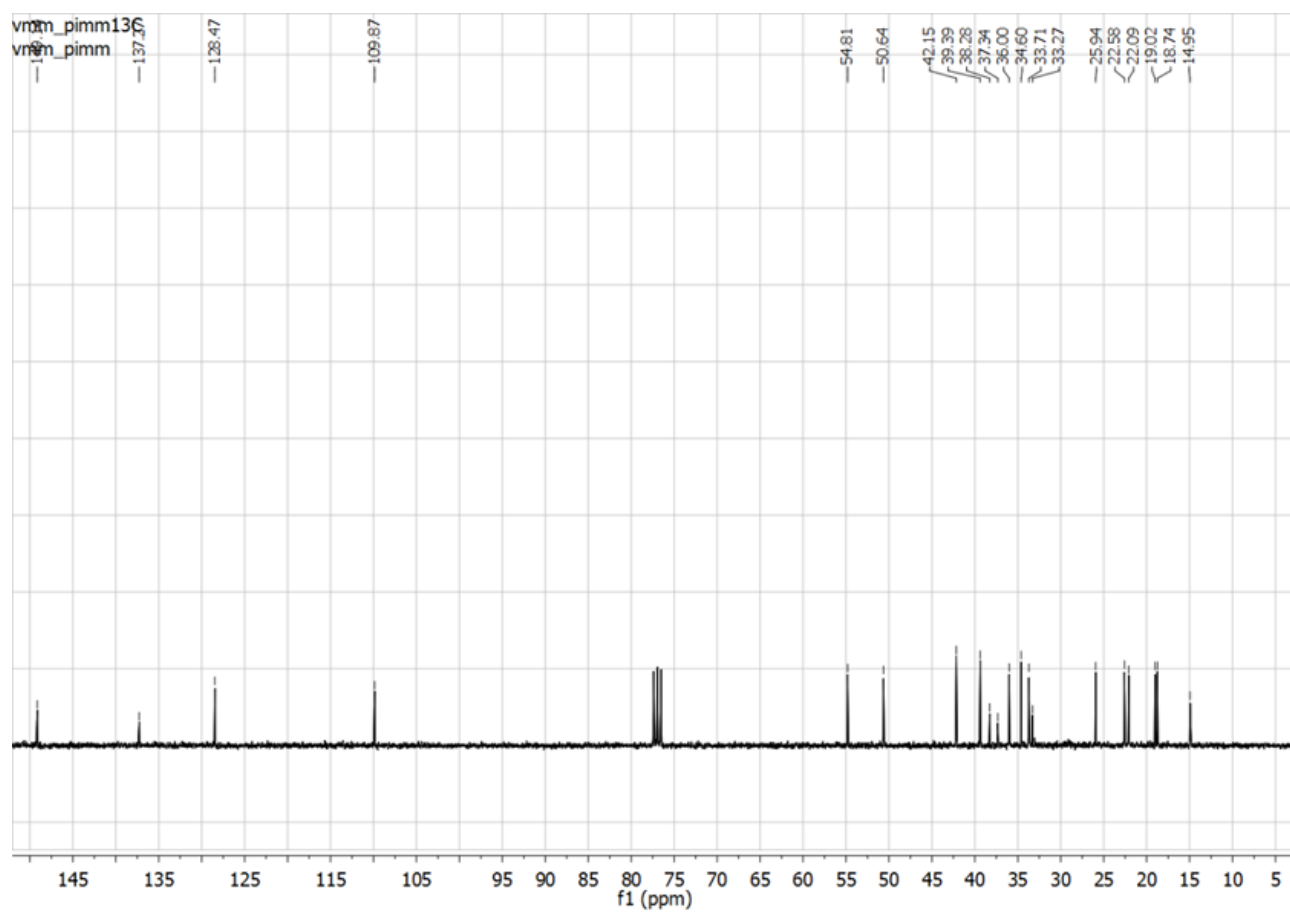

**Fig. 2S** <sup>13</sup>C-NMR spectrum of *ent*-pimara-8(14),15-diene recorded in CDCl<sub>3</sub>

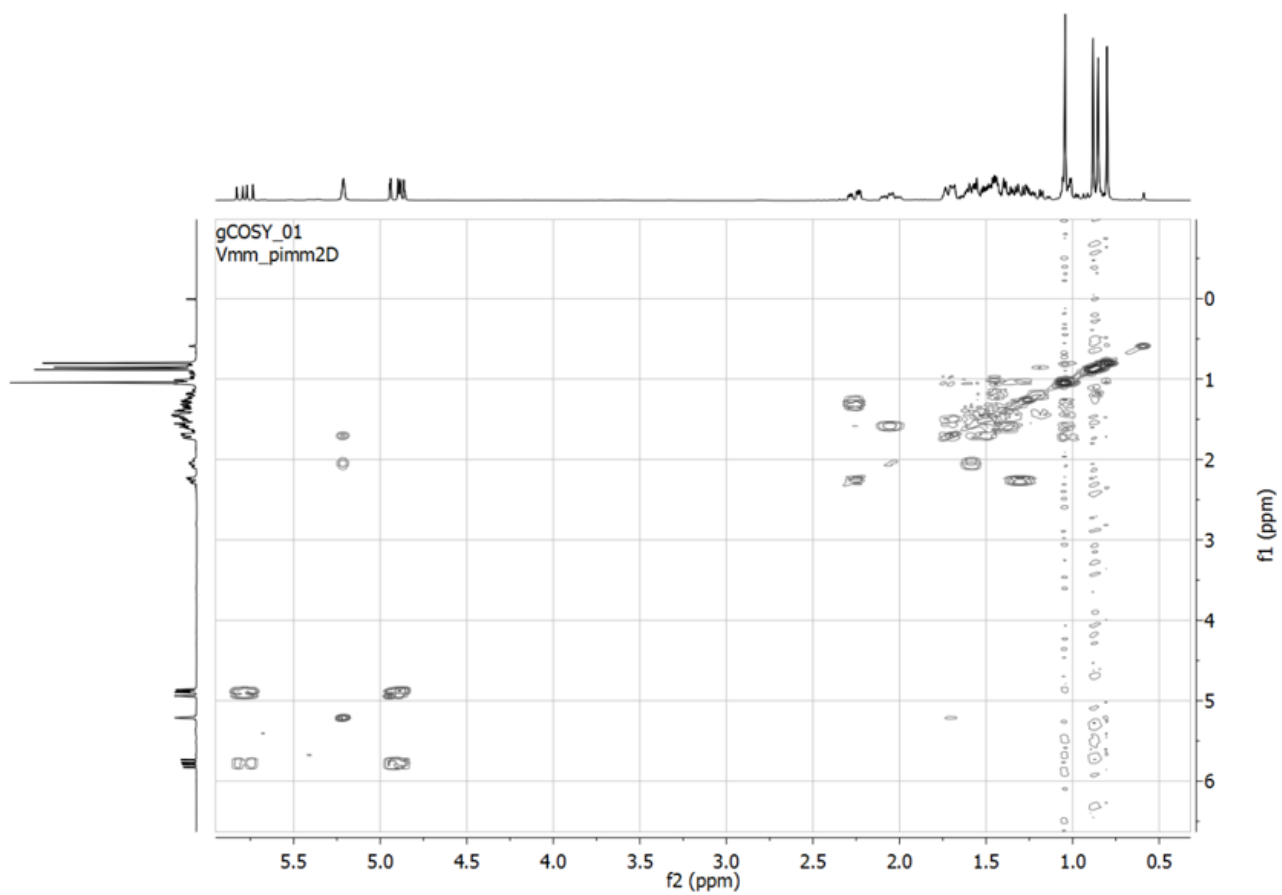

**Fig. 3S** COSY spectrum of *ent*-pimara-8(14),15-diene recorded in CDCl<sub>3</sub>

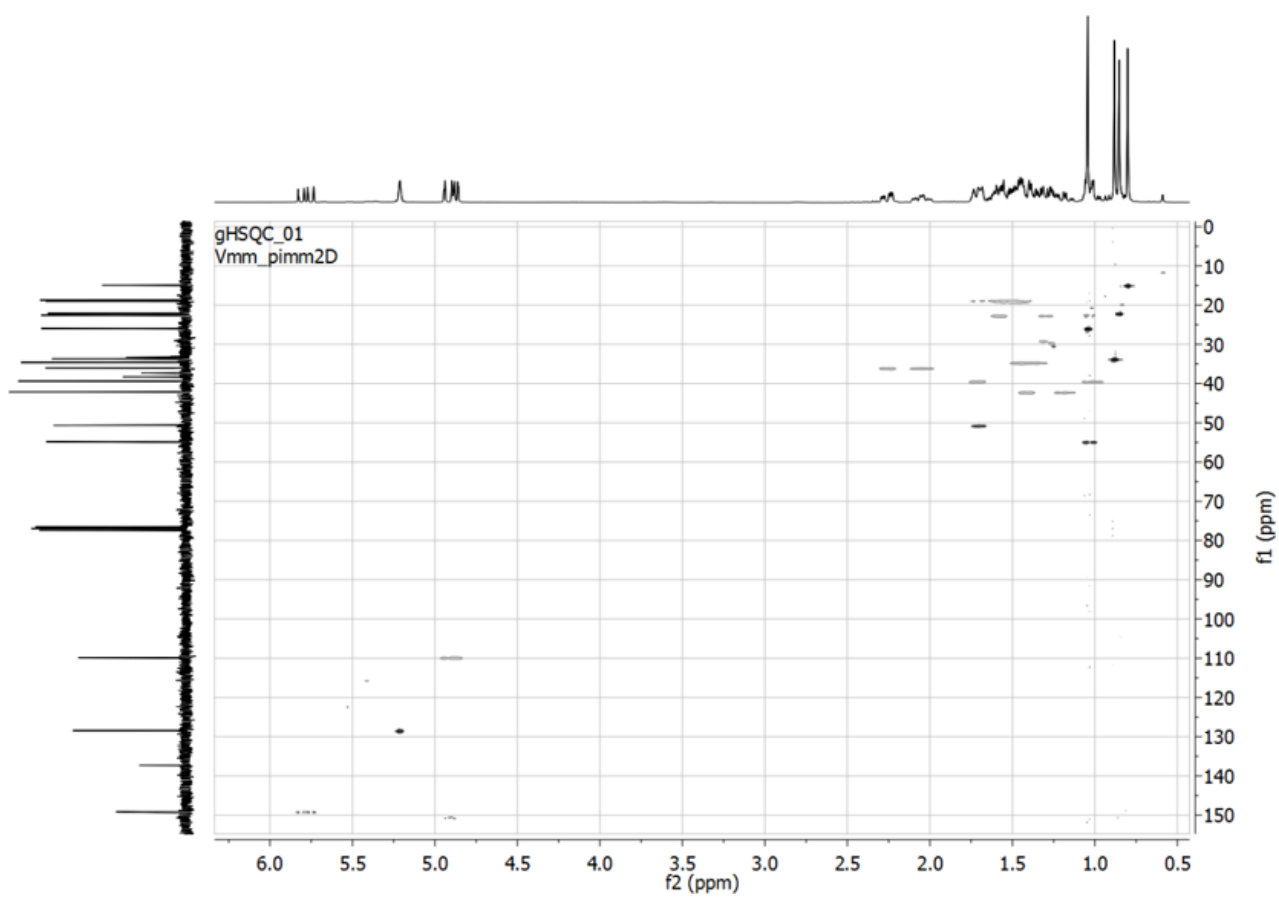

**Fig. 4S** HSQC spectrum of *ent*-pimara-8(14),15-diene recorded in CDCl<sub>3</sub>

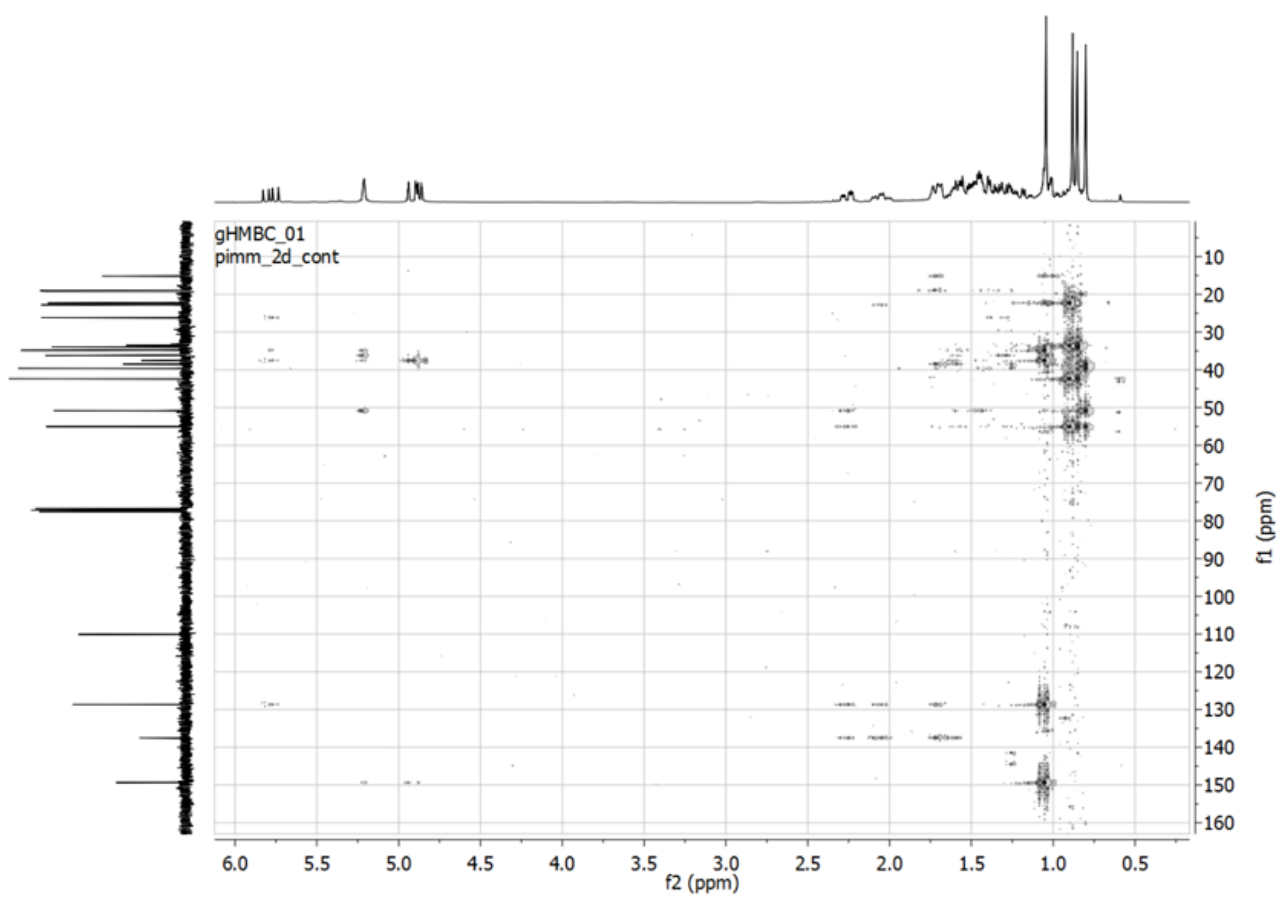

**Fig. 5S** HMBC spectrum of *ent*-pimara-8(14),15-diene recorded in CDCl<sub>3</sub>

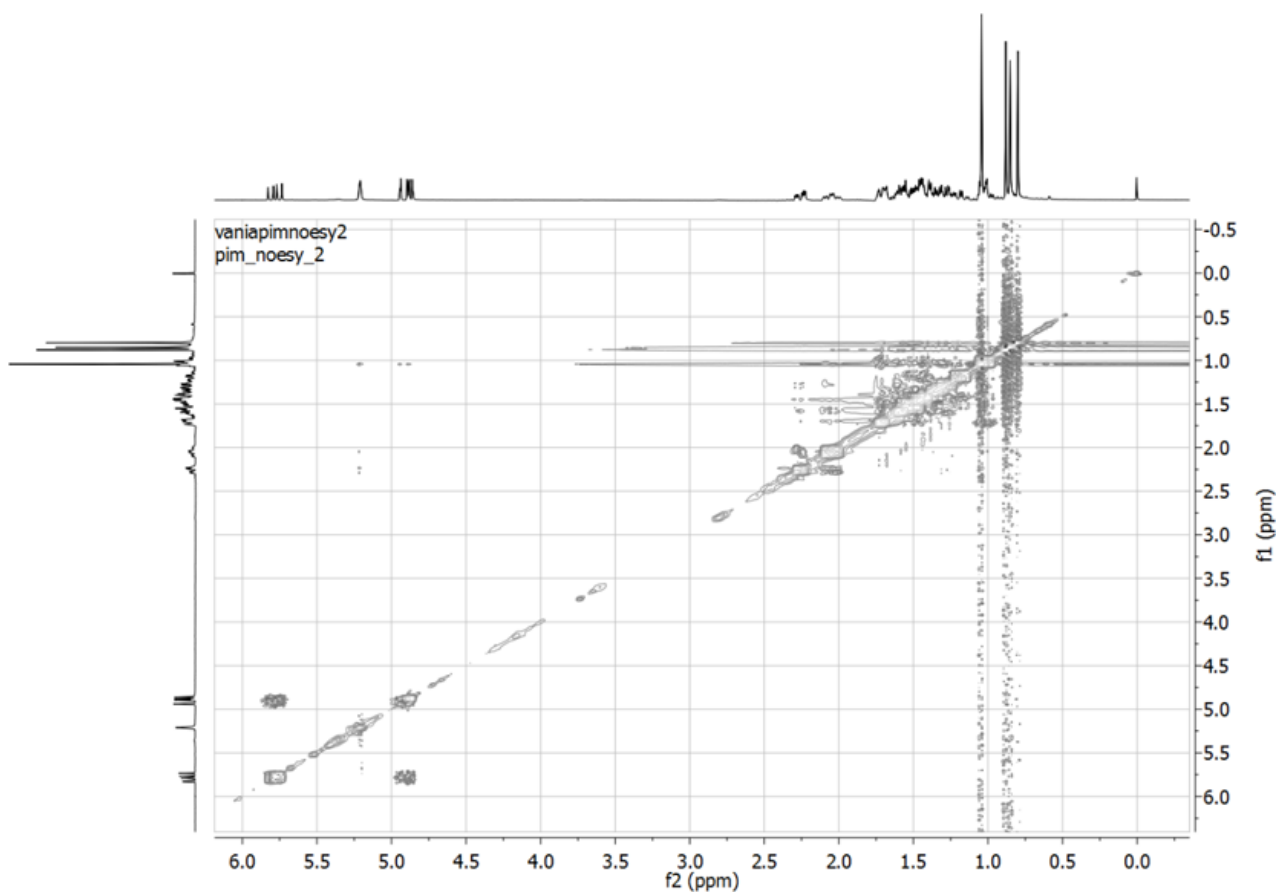

**Fig. 6S** NOESY spectrum of *ent*-pimara-8(14),15-diene recorded in CDCl<sub>3</sub>
